# Supplementary material for: Screening of Obese Offspring of First-Cousin Consanguineous Subjects for the Angiotensin-Converting Enzyme Gene with a 287-bp Alu Sequence
Source: PubMed Central journal article supplement — J Obes Metab Syndr. 2021 Mar 3;30(1):63–71. doi: 10.7570/jomes20086 (PMC8017326; doi:10.7570/jomes20086), 2021-03-03
Supplement: jomes-30-1-63_Supple.pdf [file jomes-30-1-63_Supple.pdf]

**Supplementary Table 1.** Sample size, power calculation, and HWE

| Gene       | Polymorphism | Allele | Frequency (%) | OR  | Sample size (case/control) | Power (%) | HWE  | <i>P</i> |
|------------|--------------|--------|---------------|-----|----------------------------|-----------|------|----------|
| <i>ACE</i> | rs4646994    | D      | 88.5          | 4.9 | 91/100                     | 80%       | 4.79 | 0.028    |

HWE, Hardy-Weinberg equilibrium; OR, odds ratio; *ACE*, angiotensin-converting enzyme; D, deletion.

**Supplementary Table 2.** ANOVA analysis between *ACE* gene genotypes and anthropometric measurements

| Anthropometric particulars | II genotype (n= 10) | ID genotype (n= 1) | DD genotype (n= 80) | <i>P</i> |
|----------------------------|---------------------|--------------------|---------------------|----------|
| Age (yr)                   | 28.10± 12.43        | 15.00± 0.00        | 29.74± 12.49        | 0.47     |
| Weight (kg)                | 90.99± 42.46        | 95.80± 0.00        | 99.12± 30.39        | 0.74     |
| Height (cm)                | 139.17± 36.40       | 168.00± 0.00       | 158.28± 16.61       | 0.01     |
| BMI (kg/m <sup>2</sup> )   | 39.55± 12.33        | 33.94± 0.00        | 37.97± 11.04        | 0.85     |

Values are presented as mean± standard error.

ANOVA, analysis of variance; *ACE*, angiotensin-converting enzyme; I, insertion; D, deletion; BMI, body mass index.

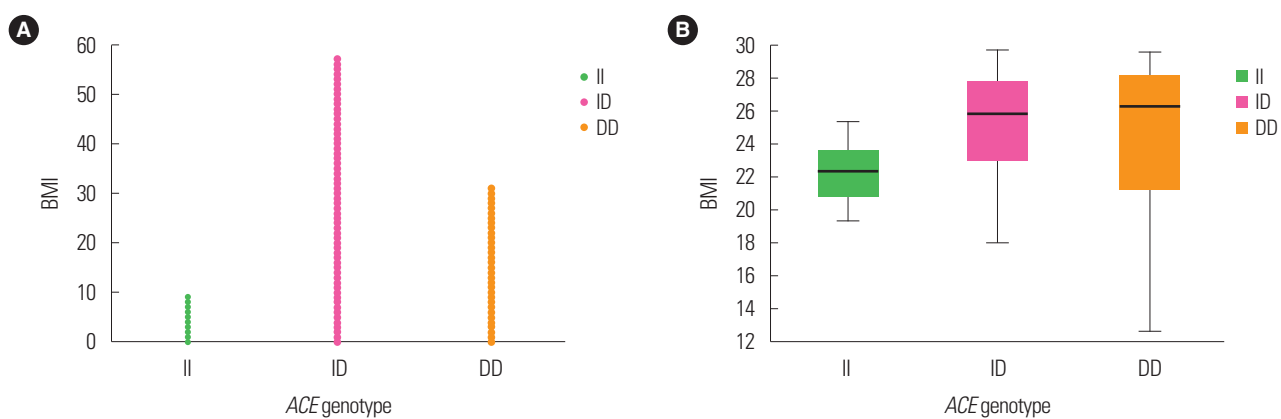

**Supplementary Figure 1.** Scatter plot (A) and box plot (B) representing the association between angiotensin-converting enzyme (*ACE*) genotypes and body mass index (BMI) in the control subjects. I, insertion; D, deletion.

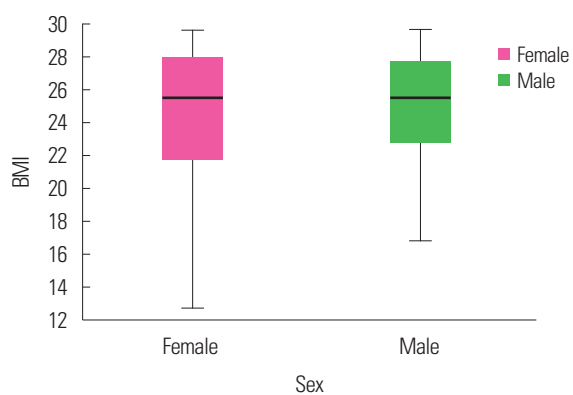

**Supplementary Figure 2.** Representation of the association between sex and body mass index (BMI) in control subjects through a box plot diagram.
